# Supplementary material
Source: PubMed Central journal article supplement (PMC4483585)
Supplement: ASN.2014050463_ASN2014050463SupplementaryData.pdf [file ASN.2014050463_ASN2014050463SupplementaryData.pdf]

## **Supplemental Data (7 figures with legends)**

**microRNA-687 induced by HIF-1 targets PTEN in renal ischemia-reperfusion injury**

**(Kirti Bhatt, Qingqing Wei, Navjotsingh Pabla, Guie Dong, Qing-Sheng Mi, Changlin Mei, Zheng Dong)**

## Supplemental Figure 1

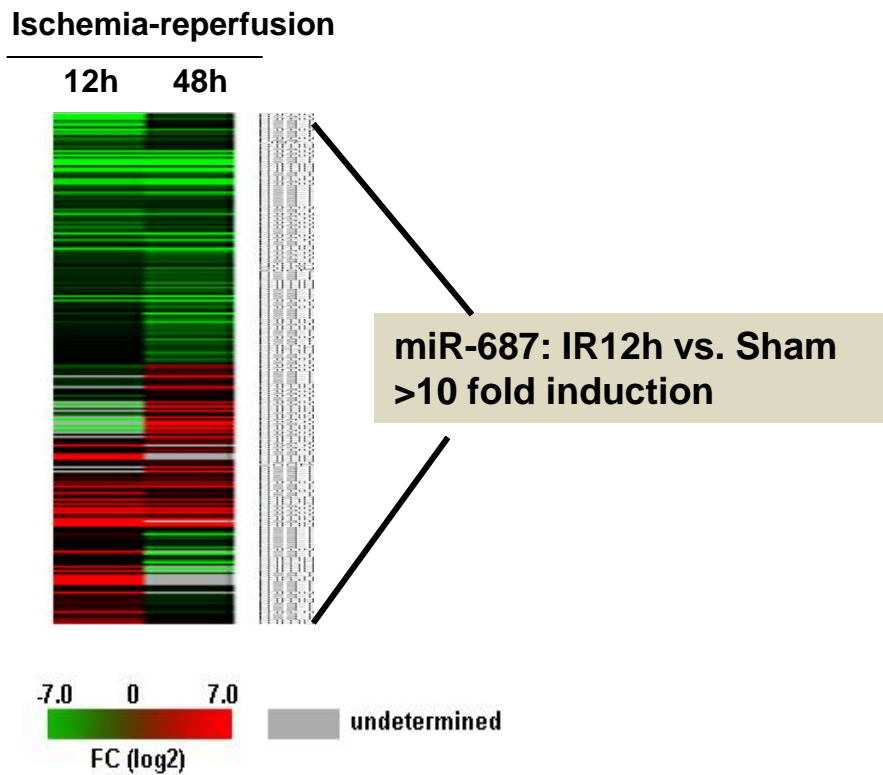

**Heatmap of microarray analysis of microRNA expression during renal IRI.** C57BL/6 mice were subjected to 30 minutes of ischemia followed by 12 or 48 hours of reperfusion. Sham-operated mice were used as control. Total RNA was extracted from renal cortical tissues for microRNA microarray analysis.  $\Delta$ Ct values of all miRNAs were used to generate the heat map.

## Supplemental Figure 2

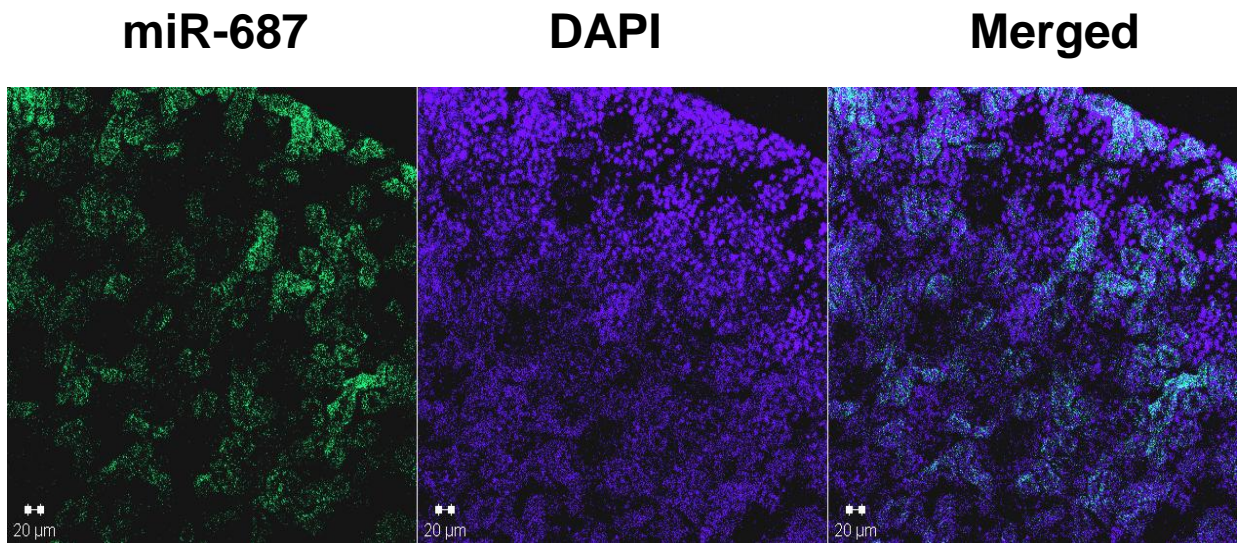

**FISH analysis of miR-687 induction during renal IRI in kidney tissues.** C57BL/6 mice were subjected to 30 minutes of renal ischemia followed by 12 hours of reperfusion. Cryosections of renal tissues were used for FISH analysis using a specific miR-687 probe with DAPI co-staining. Green-miR-687; Blue-nuclei. The results show induction of miR-687 in specific renal tubules in cortical tissues.

### Supplementary Figure 3

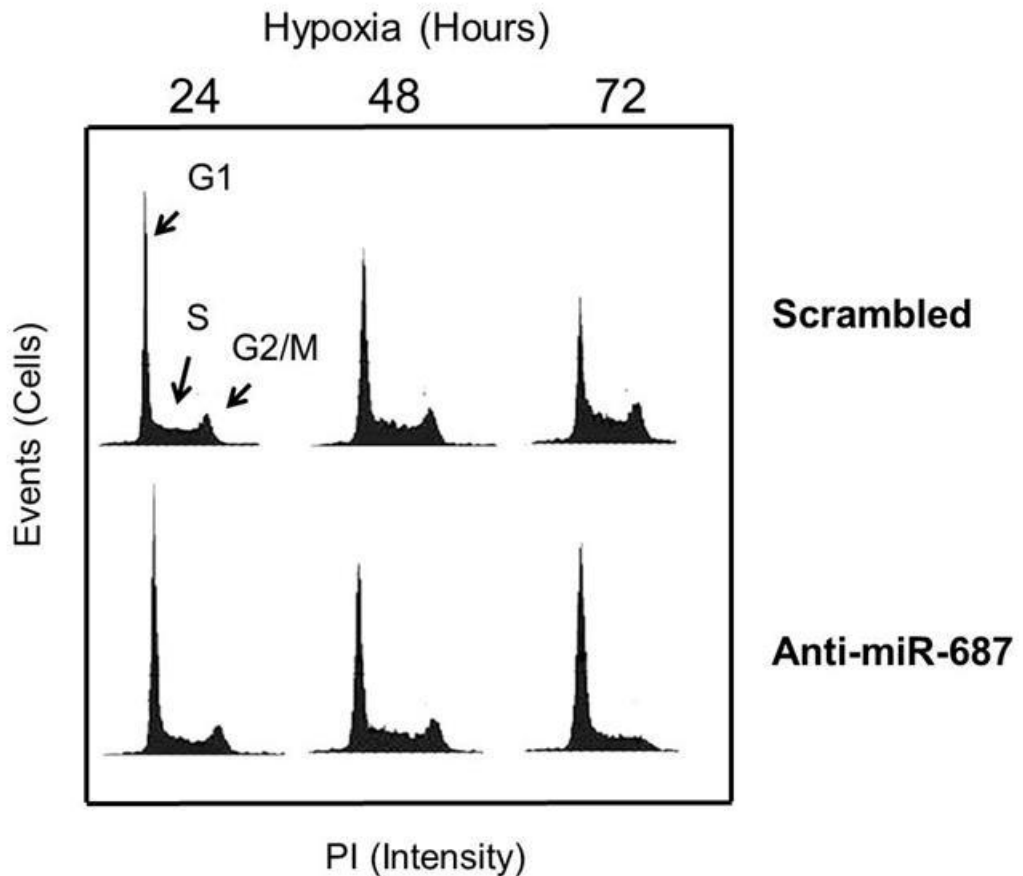

**Representative FACS analysis of cell cycle.** HEK cells were transfected with either scrambled LNA or anti-miR-687 LNA, and then subjected to hypoxia for 24-72 hours. For FACS analysis of cell cycle distribution of the cell population, the cells were stained with PI. The results show that hypoxia induced an increase in cells in S and G/M phase accompanied by a decrease in cells in G1 phase (Scrambled); anti-miR687 suppressed hypoxia-induced cell cycle changes.

## Supplementary Figure 4

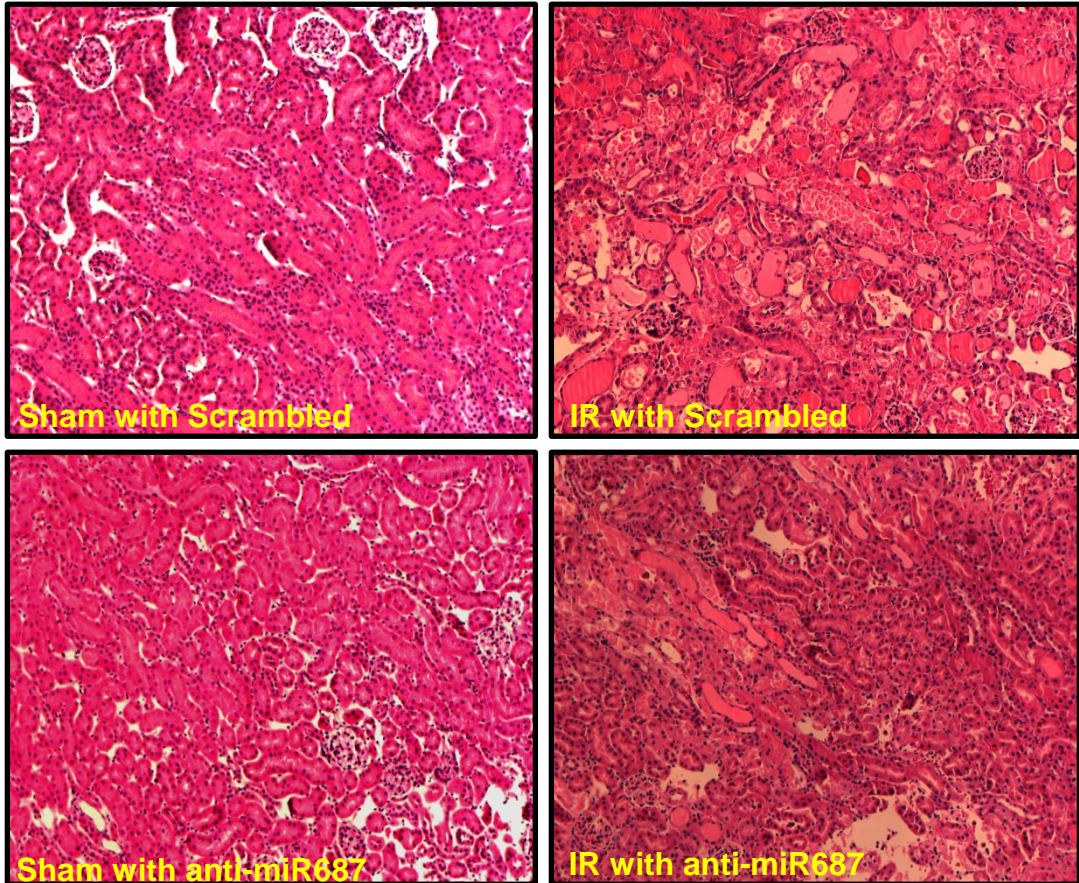

**Representative histology showing the protective effect of anti-miR-687 in renal IRI.** C57BL/6 mice were subjected to 30min renal ischemia and 48h reperfusion in the presence of scrambled LNA or anti-miR-687 LNA. Kidney tissues were collected for H&E staining for histological analysis.

## Supplementary Figure 5

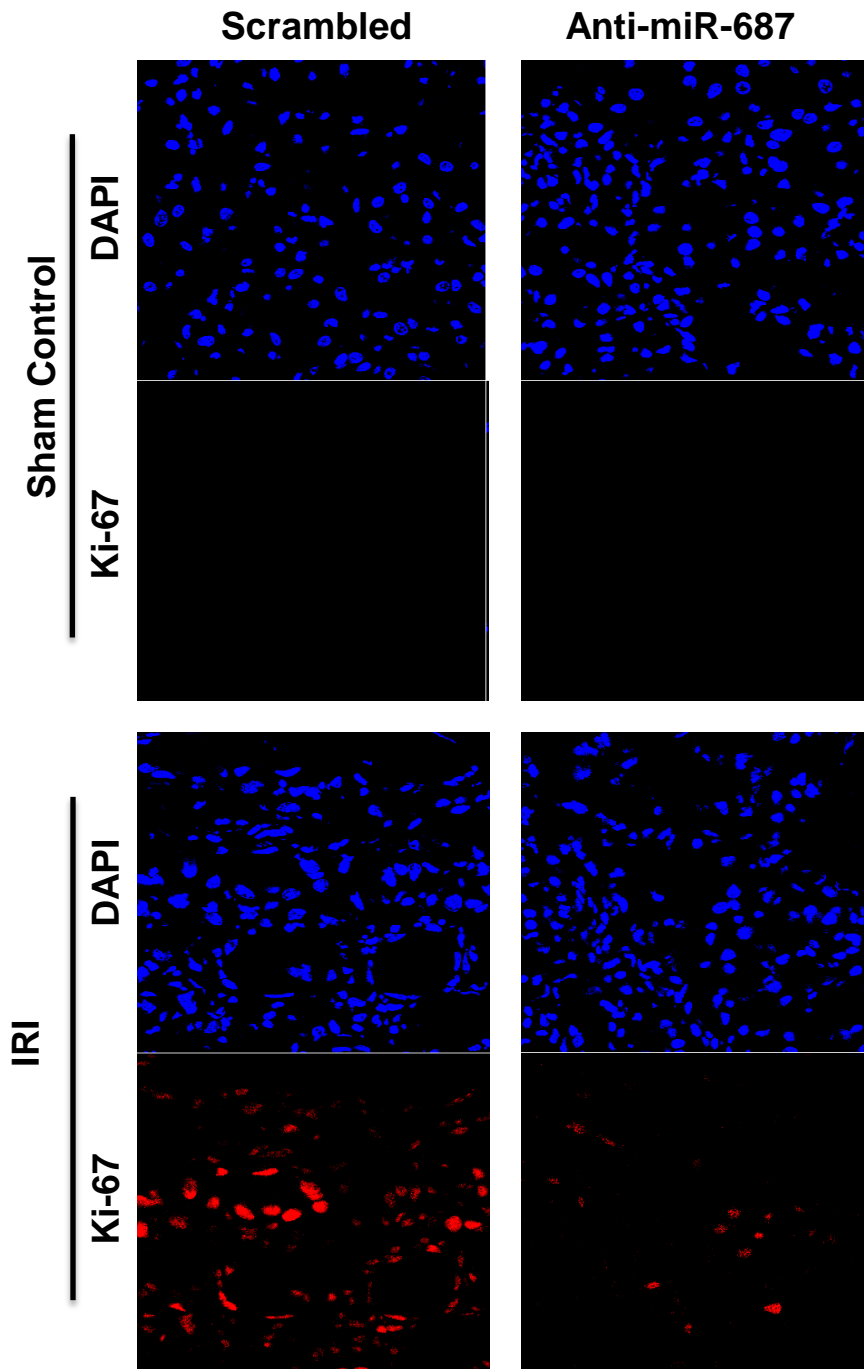

**Representative ki67 staining showing the effect of anti-miR687 on cell cycle activation during renal IRI.** C57BL/6 mice were subjected to renal IRI or sham operation in the presence of either scrambled or anti-miR-687 LNA. Renal tissues cryosections were processed for immunofluorescence analysis of Ki-67. The results show that renal IRI induced the number of Ki-67 positive proliferative cells, which was reduced in the presence of anti-miR-687.

## Supplemental Figure 6

### A

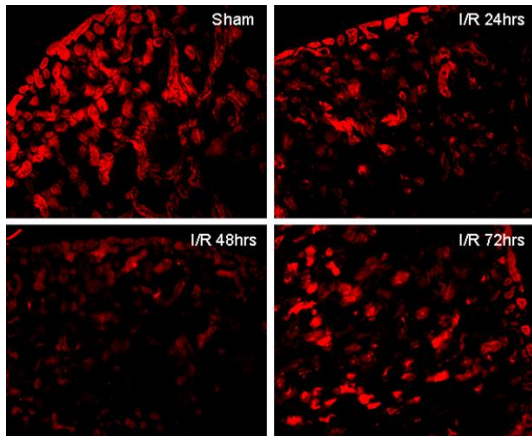

### b

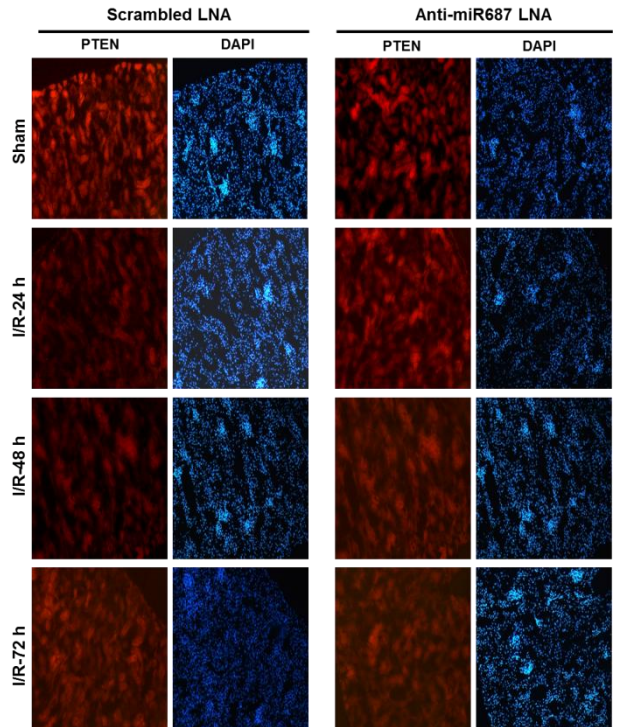

**PTEN decrease in renal IRI and the inhibition by anti-miR-687.** **(a)** C57BL/6 mice were subjected to IRI and renal tissues were collected at indicated time-points. Cryosections of renal tissues were used for immunofluorescence analysis of PTEN expression. The results show a transient yet remarkable decrease of PTEN within 48 hours of reperfusion. **(b)** C57BL/6 mice were subjected to IRI in the presence of either scrambled or anti-miR-687 LNA. Renal tissues sections were collected at indicated time-points for immunofluorescence analysis of PTEN. The results show that anti-miR-687 prevented the decrease in PTEN observed during the early (24-48h) reperfusion period in the scrambled LNA group.

## Supplemental Figure 7

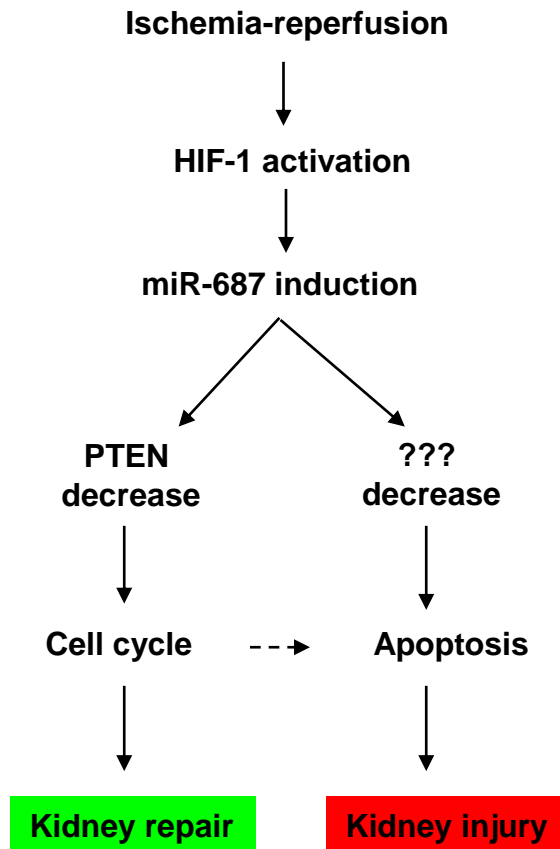

**Schematic diagram of HIF-1/miR-687/PTEN signaling axis in renal IRI.** Ischemia-reperfusion leads to the activation of HIF-1 in kidney tubular cells, which transactivates the expression and induction of miR-687. miR-687 then targets and represses PTEN, contributing to cell cycle activation and cell proliferation for kidney repair. miR-687 may also lead to apoptosis by targeting other downstream genes. Dashed arrow: the activation of cell cycle may increase cellular sensitivity to apoptosis.
